# Supplementary material for: Saxon Epidemiological Study in General Practice-6 (SESAM-6): protocol of a cross-sectional study
Source: HighWire-hosted journal article supplement (doi:10.1136/bmjopen-2024-084716), 2024-05-01
Supplement: bmjopen-2024-084716supp001_data_supplement.pdf [file bmjopen-2024-084716supp001_data_supplement.pdf]

**Description of documenting physician and associated medical practice SESAM-6**

Study ID \_ \_ \_ \_

Gender: Male ☐ Female ☐ diverse ☐

Age (years): \_ \_

Professional status: established ☐  
employed full-time ☐  
employed part-time with \_ \_ hours per week ☐  
other, namely \_ \_ \_ \_ \_ ☐

Specialist title: General medicine ☐  
Internal medicine ☐  
Doctor in further training ☐  
Other: \_ \_ \_ \_ \_ ☐

Practising as a GP since: \_ \_ \_ \_ \_ (year)

Type of medical practice: Individual practice ☐  
Joint practice/group practice ☐  
Medical care centre (MVZ) ☐  
other, namely \_ \_ \_ \_ \_ ☐

Total number of medical staff incl. salaried doctors: \_ \_ \_ \_

Number of employed non-medical staff:

Total number: \_ \_ of which are MFA \_ \_ Nurses and health care assistants \_ \_

Other, namely: \_ \_ \_ \_ \_ + Number (other): \_ \_

Size of the municipality in which your medical practice is located:

<5000 ☐ 5000-20.000 ☐ 20.001-100.000 ☐ >100.000 ☐

Has at least one of your medical assistants/nurses been trained as a VERAH® and/or N  PaH  
(care assistant in the GP practice/non-medical practice assistant)?

yes ☐ no ☐ aspired to ☐

Your estimated personal average number of notes per quarter: \_ \_ \_ \_

Your personal average number of home visits per week: \_ \_ \_

What is the estimated percentage of patients over 65 years of age in the total patient  
population? \_ \_ %

How many nursing home patients per quarter do you care for? \_ \_ \_

Does your practice delegate the performance of home visits (HB)? (*multiple answers possible*)

- no ☐ Yes, to: ☐ Doctors in further training ☐  
Non-medical staff without additional qualifications ☐  
Non-medical staff with additional qualifications (e.g. VERAH®) ☐  
Home nursing care ☐  
other, namely \_\_\_\_\_ ☐

How do you organise home visits in your practice? (*multiple answers possible*)

There are fixed days for HB, namely: ☐

Mo ☐ Tue ☐ Mi ☐ Do ☐ Fri ☐ Sat ☐ So ☐

There are fixed HB times: ☐

in the morning ☐ before midday ☐ midday ☐ in the afternoon ☐ in the evening ☐  
according to requirement ☐

Other \_\_\_\_\_ ☐

In which of the SESAM studies mentioned have you already participated?

SESAM-1 ☐ SESAM-2 ☐ SESAM-3 ☐ SESAM-4 ☐ SESAM-5 ☐ at none ☐

Are you ...

Member of SGAM yes ☐ no ☐

Member of the General Practitioners' Association yes ☐ no ☐

Teaching practice yes ☐ no ☐

Research practice yes ☐ no ☐
