# Supplementary material for: Saxon Epidemiological Study in General Practice-6 (SESAM-6): protocol of a cross-sectional study
Source: HighWire-hosted journal article supplement (doi:10.1136/bmjopen-2024-084716), 2024-05-01
Supplement: bmjopen-2024-084716supp002_data_supplement.pdf [file bmjopen-2024-084716supp002_data_supplement.pdf]

Patient documentation form SESAM-6

Physician ID:

Date of the utilisation:  morning ☐ afternoon ☐

Gender of the patient: male ☐ female ☐ diverse ☐

Age group:  
0-4 ☐ 5-9 ☐ 10-14☐ 15-18☐ 19-25☐ 26-30☐ 31-35☐ 36-40☐ 41-45☐ 46-50☐  
51-55 ☐ 56-60☐ 61-65☐ 66-70☐ 71-75☐ 76-80☐ 81-85☐ 85-90☐ 91-95☐ >95 ☐

Mother tongue: german ☐ other ☐ don't know ☐

Language barrier: present ☐ partially present ☐ not present ☐

Familiarity: patient known ☐ patient new ☐

Scheduling: acute appointment ☐ scheduled appointment ☐

Contact initiation: independent ☐ care service ☐ relatives ☐  
control date/routine date ☐ does not know ☐

Type of GP-patient contact: Presence ☐ Phone ☐ Video ☐

Chronically ill: yes ☐ no ☐

Already known .....

long-term diagnoses: .....  
.....  
.....  
.....

Existing prescribed long-term medication: none ☐ 1-3 ☐ >3 ☐

Reasons for encounter: 1 ☐ 2 ☐ 3 ☐ >3 ☐

|                                  | known                    | new                      |
|----------------------------------|--------------------------|--------------------------|
| Main reasons for the utilisation | <input type="checkbox"/> | <input type="checkbox"/> |
| (Reasons for encounter):         | <input type="checkbox"/> | <input type="checkbox"/> |
|                                  | <input type="checkbox"/> | <input type="checkbox"/> |
| Current new "Diagnosis"          |                          |                          |
| (Consultation results):          |                          |                          |
|                                  |                          |                          |

Please turn

|                                    |                          |
|------------------------------------|--------------------------|
| wait-and-see approach              | <input type="checkbox"/> |
| referral                           | <input type="checkbox"/> |
| inpatient referral                 | <input type="checkbox"/> |
| Re-order                           |                          |
| long-term                          | <input type="checkbox"/> |
| short-term                         | <input type="checkbox"/> |
| DMP first prescribed               | <input type="checkbox"/> |
| DMP following                      | <input type="checkbox"/> |
| Certificate of incapacity for work | <input type="checkbox"/> |
| Other:                             | <input type="checkbox"/> |

|                         |                          |
|-------------------------|--------------------------|
| Physiotherapy           | <input type="checkbox"/> |
| Occupational therapy    | <input type="checkbox"/> |
| Speech therapy          | <input type="checkbox"/> |
| Podiatry                | <input type="checkbox"/> |
| Aids                    | <input type="checkbox"/> |
| Home nursing care       | <input type="checkbox"/> |
| Rehabilitation measures | <input type="checkbox"/> |
| ÜW Psychotherapy        | <input type="checkbox"/> |
| Other: .....            |                          |

Duration of GP-patient contact (in min): .....
